## **Workplace infection control measures and perceived organizational support during the COVID-19 pandemic in Japan: a prospective cohort study**

Takahiro Mori<sup>1</sup>, MD, MOH, Tomohisa Nagata<sup>1</sup>, MD, PhD, Hajime Ando<sup>2</sup>, MD, MOH, PhD, Ayako Hino<sup>3</sup>, MD, PhD, Seiichiro Tateishi<sup>4</sup>, MD, PhD, Mayumi Tsuji<sup>5</sup>, MD, PhD, Ryutaro Matsugaki<sup>6</sup>, PhD, Yoshihisa Fujino<sup>7</sup>, MD, MPH, PhD, Koji Mori<sup>1</sup>, MD, PhD, for the CORoNaWork project

### Affiliations:

1 Department of Occupational Health Practice and Management, Institute of Industrial Ecological Sciences, University of Occupational and Environmental Health, Japan

2 Department of Work Systems and Health, Institute of Industrial Ecological Sciences, University of Occupational and Environmental Health, Japan

3 Department of Mental Health, Institute of Industrial Ecological Sciences, University of Occupational and Environmental Health, Japan

4 Disaster Occupational Health Center, Institute of Industrial Ecological Sciences, University of Occupational and Environmental Health, Japan

5 Department of Environmental Health, School of Medicine, University of Occupational and Environmental Health, Japan

6 Department of Public Health, School of Medicine, University of Occupational and Environmental Health, Japan

7 Department of Environmental Epidemiology, Institute of Industrial Ecological Sciences, University of Occupational and Environmental Health, Japan

Corresponding author: Koji Mori, MD, PhD

Department of Occupational Health Practice and Management, Institute of Industrial Ecological Sciences, University of Occupational and Environmental Health, Japan, 1-1 Iseigaoka, Yahatanishi-ku, Kitakyushu 807-8555, Japan.

E-mail: [kmori@med.uoeh-u.ac.jp](mailto:kmori@med.uoeh-u.ac.jp); Tel: +81-93-603-1611; Fax: +81-93-603-2155

Funding Sources: This study was supported and partly funded by the research grant from the University of Occupational and Environmental Health, Japan (no grant number); Japanese Ministry of Health, Labour and Welfare (H30-josei-ippan-002, H30-roudou-ippan-007,

19JA1004, 20JA1006, 210301-1, and 20HB1004); Anshin Zaidan (no grant number), the Collabo-Health Study Group (no grant number), and Hitachi Systems, Ltd. (no grant number) and scholarship donations from Chugai Pharmaceutical Co., Ltd. (no grant number). The funder was not involved in the study design, collection, analysis, interpretation of data, the writing of this article or the decision to submit it for publication.

Conflict of Interest: None Declared

Acknowledgments: The current members of the CORoNaWork Project, in alphabetical order, are as follows: Dr. Akira Ogami, Dr. Ayako Hino, Dr. Hajime Ando, Dr. Hisashi Eguchi, Dr. Keiji Muramatsu, Dr. Koji Mori, Dr. Kosuke Mafune, Dr. Makoto Okawara, Dr. Mami Kuwamura, Dr. Mayumi Tsuji, Dr. Ryutaro Matsugaki, Dr. Seiichiro Tateishi, Dr. Shinya Matsuda, Dr. Tomohiro Ishimaru, and Dr. Tomohisa Nagata, Dr. Yoshihisa Fujino (present chairperson of the study group), and Dr. Yu Igarashi. All members are affiliated with the University of Occupational and Environmental Health, Japan.

Ethical approval: This study was approved by the ethics committee of the University of Occupational and Environmental Health, Japan (reference No. R2-079 and R3-006) .

Informed Consent: Informed consent was obtained in the form of the website.

Running Head Title: Workplace measures and organizational support

1 Abstract

2 Objective: We investigated whether workplace infection control measures during the  
3 COVID-19 pandemic could increase perceived organizational support (POS).

4 Methods: This prospective cohort study was conducted in Japan from December 2020 to  
5 December 2021 using a questionnaire survey. There were 18,560 respondents at follow-up;  
6 we investigated 4,971 who rated low POS at baseline. The participants were asked a single  
7 question about POS and nine about workplace infection control measures. We determined the  
8 odds ratios (ORs) of high POS at follow-up using multilevel logistic regression analysis.

9 Results: The groups of 5–6 (OR=1.29; 95% confidence interval [CI], 1.05–1.57;  $P=0.014$ )  
10 and 7–9 workplace infection control measures (OR=1.54; 95% CI, 1.28–1.85;  $P<0.001$ ) had  
11 significantly higher ORs than the group with 0–2 measures.

12 Conclusions: Health support for employees through workplace infection control measures can  
13 increase POS.

14

15 Keywords: perceived organizational support, workplace infection control measures, health  
16 support, COVID-19, Japan

17

18 **Introduction**

19 Defined as global beliefs concerning the extent to which an organization values employee  
20 contributions and cares about their well-being, perceived organizational support (POS) is an  
21 indicator of the relationship quality between employees and organizations.<sup>1</sup> POS is known to  
22 be related to favorable outcomes for both. For example, high POS reportedly reduces job  
23 stress and burnout; it increases job satisfaction, work engagement, employee performance,  
24 organizational commitment, and organizational citizenship behavior.<sup>2</sup> Even during the  
25 COVID-19 pandemic, studies have identified the association between POS and employee  
26 well-being-related indicators among health-care professionals and other workers. Research  
27 has reported that high POS relieves work stress, anxiety, depression, and burnout; it increases  
28 job satisfaction, organizational commitment, and work productivity.<sup>3-10</sup> Increasing POS would,  
29 therefore, be of great significance to employees and organizations—even under the special  
30 circumstances of the pandemic.

31 POS has been found to be increased by several antecedent factors. According to a  
32 review by Sun, organizational factors (such as organizational fairness and justice), individual  
33 factors (such as employees' traditional values and job status), and the relationship between  
34 organization and employees (such as values match between individuals and organization and  
35 leadership style) are reportedly antecedent factors for increasing POS.<sup>2</sup> According to the  
36 definition of POS as the employee's perception of organizational support for their well-being,  
37 providing workplace health support programs for employees may increase POS. In this regard,  
38 Grossmeier et al. investigated health and well-being best practices affecting POS among 812  
39 organizations; they found that organizations with greater organizational and leadership  
40 support for employee health had higher POS.<sup>11</sup> However, to our knowledge, no reports have  
41 shown that a workplace health support program for employees increased POS.

42 Under the COVID-19 pandemic, workplace infection control measures are intended

43 to protect the health and life of employees, and so they may increase POS. It has been  
44 observed that adequate workplace infection control measures in Japan can cause positive  
45 changes at the individual employee level (such as positive effects on employee mental  
46 well-being and work performance and enhancing individual infection control measures).<sup>12-14</sup>  
47 Considering these studies, we hypothesized that workplace infection control measures could  
48 improve both individual changes and POS, which reflects the relationship between  
49 organizations and employees.

50 If the results showed that POS increased as a result of workplace infection control  
51 measures, workplace health support programs for employees could increase POS. Workplace  
52 infection control measures during the COVID-19 pandemic could also lead to favorable  
53 outcomes for organizations and employees (such as improved work engagement and  
54 employee productivity) by increasing POS. Thus, we conducted a prospective cohort study to  
55 investigate whether workplace infection control measures could enhance POS.

56

57

## 58 **Methods**

### 59 **Study design and participants**

60 This prospective cohort study was conducted from December 2020 to December  
61 2021 by a research group, the Collaborative Online Research on Novel-coronavirus and Work  
62 study (CORoNaWork study) of the University of Occupational and Environmental Health,  
63 Japan. Data were collected using a self-administered online questionnaire survey delivered via  
64 Internet survey company Cross Marketing Inc. (Tokyo, Japan). Details of the study protocol  
65 for the baseline survey have been previously reported.<sup>15</sup> The participants included were  
66 workers aged 20–65 years at baseline; sampling was conducted by considering sex,  
67 occupation, and region of residence. In all, 33,087 were recruited; after excluding 6,051 who

68 provided invalid responses, we included 27,036 participants in the baseline. We adopted the  
69 following criteria for invalidity: participants who completed the survey in extremely short  
70 response times; those who were shorter than 140 cm or weighed less than 30 kg; and those  
71 who gave inconsistent answers to multiple identical questions.

72 Those participants received a follow-up survey in December 2021, 1 year after  
73 baseline. In all, 18,560 participants responded to the follow-up survey (68.6% follow-up rate).  
74 The exclusion criteria for the present study were as follows: self-employed workers; workers  
75 in small or home offices; agriculture, forestry, and fishery workers; participants who retired or  
76 changed jobs after the baseline survey; and those who rated highly for POS in the baseline  
77 survey (our aim was to target participants with low POS at baseline). We also excluded  
78 participants who failed to respond to a question about POS at follow-up. We finally analyzed  
79 the data of 4,971 participants. Figure 1 is a flow chart for the study.

80 This study was approved by the Ethics Committee of the University of Occupational  
81 and Environmental Health, Japan (Approval numbers: R2-079 and R3-006). Informed consent  
82 was obtained from all participants on the form of the website.

83

#### 84 **Assessment of POS**

85 We evaluated POS at baseline and follow-up with the following question, drawing on a  
86 previous study<sup>16</sup>: “Your company supports employees in finding a balance between active,  
87 productive working and healthy living.” Participants answered using a four-point scale  
88 (strongly agree, agree, disagree, and strongly disagree). We classified those who chose  
89 strongly agree and agree as having high POS and the others as low POS. As noted above, we  
90 selected participants with low POS ratings at baseline.

91

#### 92 **Assessment of workplace infection control measures at baseline**

93 With reference to a previous study, participants were asked at baseline to choose whether each  
94 of the following nine workplace infection control measures was implemented:<sup>16</sup> prohibition or  
95 restriction of business trips; prohibition or restriction of visitors; prohibition of holding or  
96 limiting the number of people participating in social gatherings and meals; restriction on  
97 face-to-face meetings; requirement of always wearing masks during working hours;  
98 installation of partitions and change of workplace layout; recommendation for daily  
99 temperature checks; recommendation to telecommute; and requesting employees not go to the  
100 workplace when sick. We classified the number of workplace infection control measures into  
101 four categories: 0–2, 3–4, 5–6, and 7–9.

102

### 103 **Assessment of covariates**

104 Covariates included demographics, occupation, job type, and number of workplace employees.  
105 Age was expressed as a continuous variable. We categorized annual equivalent income into  
106 four groups: <2.50 million, 2.50–3.74 million, 3.75–4.99 million, and  $\geq 5.00$  million yen (in  
107 2021, US\$1 was equivalent to 109.75 yen).<sup>17</sup> Education was classified into three categories:  
108 up to junior high or high school, vocational school or college, and university or graduate  
109 school. We categorized occupation into 10 categories: general employee; manager; executive  
110 manager; public employee, faculty member or non-profit organization employee; temporary  
111 or contract employee; self-employed; small office/home office; agriculture, forestry, and  
112 fishing; professional occupation (e.g., lawyer, tax accountant, medical-related); and other  
113 occupation. In line with this study's selection criteria, we excluded self-employed, small  
114 office/home office, and agriculture, forestry, and fishing. Thus, we classified occupation into  
115 seven categories. We categorized job type into three groups: mainly desk work; jobs mainly  
116 involving interpersonal communication; and mainly physical work. The number of employees  
117 in the workplace was classified into four categories: 1–9, 10–99, 100–999, and  $\geq 1000$

118 employees.

119

## 120 **Statistical analyses**

121 We examined the association between the number of workplace infection control measures at  
122 baseline and high POS at follow-up. We determined age-sex adjusted odds ratios (ORs) and  
123 multivariate adjusted ORs using multilevel logistic regression analysis nested in the  
124 prefecture of residence to consider regional differences in the infection status of COVID-19.  
125 The multivariate model was adjusted for age, sex, income, education, occupation, job type,  
126 and number of workplace employees. We also conducted a trend test with the categories of the  
127 number of workplace infection control measures as continuous variables. A *P* value of less  
128 than 0.05 was considered statistically significant. We undertook all analyses using Stata  
129 Statistical Software (release 16; StataCorp LLC, College Station, TX, USA).

130

## 131 **Results**

132 Table 1 presents the characteristics of our participants according to the number of workplace  
133 infection control measures. The group with greater workplace infection control measures had  
134 higher income and education, and it had more employees than the group with the least such  
135 measures. The higher the number of workplace infection control measures, the greater was the  
136 proportion of high POS at follow-up.

137 Table 2 shows the association between number of workplace infection control  
138 measures and high POS. In the age-sex adjusted model, the groups with 5–6 (OR=1.41; 95%  
139 confidence interval [CI], 1.17–1.70;  $P<0.001$ ) and 7–9 infection control measures (OR=1.75;  
140 95% CI, 1.48–2.06;  $P<0.001$ ) had significantly higher ORs than the groups with the least  
141 infection control measures. In the multivariate model, the same results were evident: 5–6  
142 (OR=1.29; 95% CI, 1.05–1.57;  $P=0.014$ ) and 7–9 infection control measures (OR=1.54; 95%



143 CI, 1.28–1.85;  $P < 0.001$ ). We also observed a linear relationship between the categories of the  
144 number of workplace infection control measures and POS ( $P$  for trend  $< 0.001$ ).

145

## 146 **Discussion**

147 We found that among our participants, who had low POS at baseline, more workplace  
148 infection control measures during the COVID-19 pandemic significantly increased the OR for  
149 high POS 1 year later. This result supports our hypothesis of enhanced POS by health support  
150 for employees through active workplace infection control measures.

151 As to why workplace infection control measures increased POS among our  
152 participants, we considered that the employees recognized the organization valued their health  
153 by promoting initiatives that met employee needs. When employees believe they are receiving  
154 positive treatment through an organization's voluntary actions rather than from external  
155 pressure (such as through trade union negotiations and government regulations), employees  
156 evaluate the organization more highly.<sup>2</sup> Various workplace infection control measures are  
157 recommended by the Japanese government and specialized institutions<sup>18,19</sup>; however, it is up  
158 to an organization to implement such measures. It has been shown that the degree of infection  
159 control measures depends on the size of a company, job type, and other factors.<sup>20</sup> Workplace  
160 infection control measures met employee needs during the COVID-19 pandemic, and they  
161 could reduce employees' risk of and anxiety about infection.<sup>12,13</sup> Therefore, employees may  
162 have recognized that companies are actively promoting health support for them through  
163 workplace infection control measures, and then POS may have increased.

164 Studies on the association between POS and work-related well-being during the  
165 COVID-19 pandemic have found that high POS reduces employee work stress and burnout; it  
166 improves work engagement, job satisfaction, and employee performance.<sup>3-10</sup> There are reports  
167 of sufficient workplace infection control measures having positive effects on mental

168 well-being and employee work performance.<sup>12,13</sup> High POS has reportedly led to employees  
169 implementing infection control measures and more readily accepting COVID-19  
170 vaccination.<sup>16</sup> Infection control measures at the workplace have led to stronger individual  
171 infection control measures among employees during the COVID-19 pandemic.<sup>14</sup> Thus, our  
172 results suggest that POS may have mediated the association between workplace infection  
173 control measures and those outcomes (i.e., mental well-being and undertaking individual  
174 infection measures). The mediating role of POS in this regard demands further investigation.

175         We believe that our results have important implications for implementing workplace  
176 health support program—even in non-pandemic situations. Providing a health support  
177 program that meets employee needs, such as the infection control measures in this study, can  
178 increase POS. To enhance POS when providing such a program, it is necessary to grasp  
179 employee needs and to communicate with employees so that they recognize the purpose of  
180 health support for them.<sup>21</sup> Then, increasing POS will have a positive impact on management  
181 aspects of an organization, such as improved work engagement, better employee productivity,  
182 and reduced employee turnover tendency.<sup>2,22</sup> Thus, implementing a workplace health support  
183 program can lead to both enhanced employee health and good outcomes for the organization.

184         This study has some limitations. First, we evaluated POS using a simple question,  
185 and the measurement validity of POS was untested. We applied the same indicators in a  
186 previous study<sup>16</sup>; however, further research is needed to validate rigorously the measures for  
187 POS. In addition, evaluation of POS was undertaken by self-reporting, so it is possible that  
188 reporting bias occurred. We did, however, explain to participants that the survey would be  
189 anonymized, so we would expect the impact of this factor to be small.

190         Second, the workplace infection control measures we evaluated were not exhaustive.  
191 However, after reviewing a checklist of the Japanese government and the guides of  
192 specialized institutions,<sup>18,19</sup> we discussed and decided on measures that many companies

193 could adopt. Thus, we believe that our evaluation reflected the current state of COVID-19  
194 measures at each company. In addition, some organizations may have changed their  
195 workplace infection control measures during the follow-up period, and so our results could be  
196 an underestimation of the actual situation.

197 Third, we did not consider other factors that may have increased POS. Supportive  
198 human resource practices (such as providing career development opportunities, offering  
199 equitable rewards, and creating a fair environment) also enhance POS<sup>2</sup>; however, we were  
200 unable to evaluate the effects of those factors.

201 Fourth, the duration of the effect of POS improvement through infection controls is  
202 unclear. We believe it is desirable to provide new health support programs for employees so  
203 they understand that they are receiving health support from the company.

204 In conclusion, our results show that employee health support provided by an  
205 organization through workplace infection control measures can increase POS. High POS can  
206 lead to good outcomes for both employees and organizations; thus, workplace infection  
207 control measures may have benefits beyond infection control. Our results suggest that  
208 providing a health support program that meets employee needs is significant from the  
209 perspective of increasing POS—even in non-epidemic situations.

210

211

## 212 **References**

- 213 1. Eisenberger R, Huntington R, Hutchison S, Sowa D. Perceived Organizational Support.  
214 *Journal of Applied Psychology* 1986;71:500–507.
- 215 2. Sun L. Perceived Organizational Support: A Literature Review. *Int J Hum Resour Stud.*  
216 2019;9:155.
- 217 3. Kim MN, Yoo YS, Cho OH, Hwang KH. Emotional Labor and Burnout of Public Health

- 218 Nurses during the COVID-19 Pandemic: Mediating Effects of Perceived Health Status  
219 and Perceived Organizational Support. *Int J Environ Res Public Health.*;19 . Epub ahead  
220 of print 2022. DOI: 10.3390/ijerph19010549.
- 221 4. Reitz KM, Terhorst L, Smith CN, et al. Healthcare providers' perceived support from  
222 their organization is associated with lower burnout and anxiety amid the COVID-19  
223 pandemic. *PLoS One.* 2021;16:1–15.
- 224 5. Chatzittofis A, Constantinidou A, Artemiadis A, Michailidou K, Karanikola MNK. The  
225 Role of Perceived Organizational Support in Mental Health of Healthcare Workers  
226 During the COVID-19 Pandemic: A Cross-Sectional Study. *Front Psychiatry.*  
227 2021;12:1–6.
- 228 6. Yu X, Wu S, Chen W, et al. Exploring the associations between perceived organizational  
229 support and job burnout among chinese academic journal editors: A moderated mediation  
230 model. *Int J Environ Res Public Health.* 2021;18:12167.
- 231 7. Barbieri B, Balia S, Sulis I, et al. Don't Call It Smart: Working From Home During the  
232 Pandemic Crisis. *Front Psychol.* 2021;12:1–13.
- 233 8. Cyr S, Marcil MJ, Marin MF, et al. Factors Associated With Burnout, Post-traumatic  
234 Stress and Anxio-Depressive Symptoms in Healthcare Workers 3 Months Into the  
235 COVID-19 Pandemic: An Observational Study. *Front Psychiatry.* 2021;12:1–14.
- 236 9. Mihalache M, Mihalache OR. How workplace support for the COVID-19 pandemic and  
237 personality traits affect changes in employees' affective commitment to the organization  
238 and job-related well-being. *Hum Resour Manage.* 2021;1–20.
- 239 10. Kurogi K, Ikegami K, Eguchi H, et al. A cross-sectional study on perceived workplace  
240 health support and health-related quality of life. *J Occup Health.* 2021;63:1–8.
- 241 11. Grossmeier J, Castle PH, Pitts JS, et al. Workplace Well-Being Factors That Predict  
242 Employee Participation, Health and Medical Cost Impact, and Perceived Support. *Am J*

- 243        *Heal Promot.* 2020;34:349–358.
- 244    12. Sasaki N, Kuroda R, Tsuno K, Kawakami N. Workplace responses to COVID-19  
245        associated with mental health and work performance of employees in Japan. *J Occup*  
246        *Health.* 2020;62:1–6.
- 247    13. Yasuda Y, Ishimaru T, Nagata M, et al. A cross-sectional study of infection control  
248        measures against COVID-19 and psychological distress among Japanese workers. *J*  
249        *Occup Health.* 2021;63:1–8.
- 250    14. Kawasumi M, Nagata T, Ando H, et al. Association between preventive measures against  
251        workplace infection and preventive behavior against personal infection. *Ind Health.*  
252        Online ahead of print 2021. doi: 10.2486/indhealth.2021-0162.
- 253    15. Fujino Y, Ishimaru T, Eguchi H, et al. Protocol for a Nationwide Internet-based Health  
254        Survey of Workers During the COVID-19 Pandemic in 2020. *J UOEH.*  
255        2021;43:217–225.
- 256    16. Kobayashi Y, Nagata T, Fujino Y, et al. Association between perceived organizational  
257        support and COVID-19 vaccination intention: A cross-sectional study. *J Occup Health.*  
258        2021;63:1–9.
- 259    17. OECD. Exchange rates (indicator). Available at: <https://doi.org/10.1787/037ed317-en>.  
260        Accessed June 3, 2022
- 261    18. Ministry of Health, Labour and Welfare, Japan. Checklist for the prevention of  
262        COVID-19 spreading at workplaces. Available at:  
263        <https://www.mhlw.go.jp/content/000694987.pdf>. Accessed June 3, 2022
- 264    19. Suzuki H, Miyamoto T, Hamada A, Nakano A, Okoshi H, Yamasawa F. A Guide for  
265        Businesses and Employers Responding to Novel Coronavirus disease (COVID-19): 4th  
266        edition. *J Occup Health.* 2021;63:1–21.
- 267    20. Ishimaru T, Nagata M, Hino A, et al. Workplace measures against COVID-19 during the

- 268 winter third wave in Japan: Company size-based differences. *J Occup Health*.  
269 2021;63:1–6.
- 270 21. Zoller HM. Manufacturing health: employee perspectives on problematic outcomes in a  
271 workplace health promotion initiative. *West J Commun*. 2004;68:278–301.
- 272 22. Chen L, Hannon PA, Laing SS, et al. Perceived workplace health support is associated  
273 with employee productivity. *Am J Heal Promot*. 2015;29:139–146.
- 274

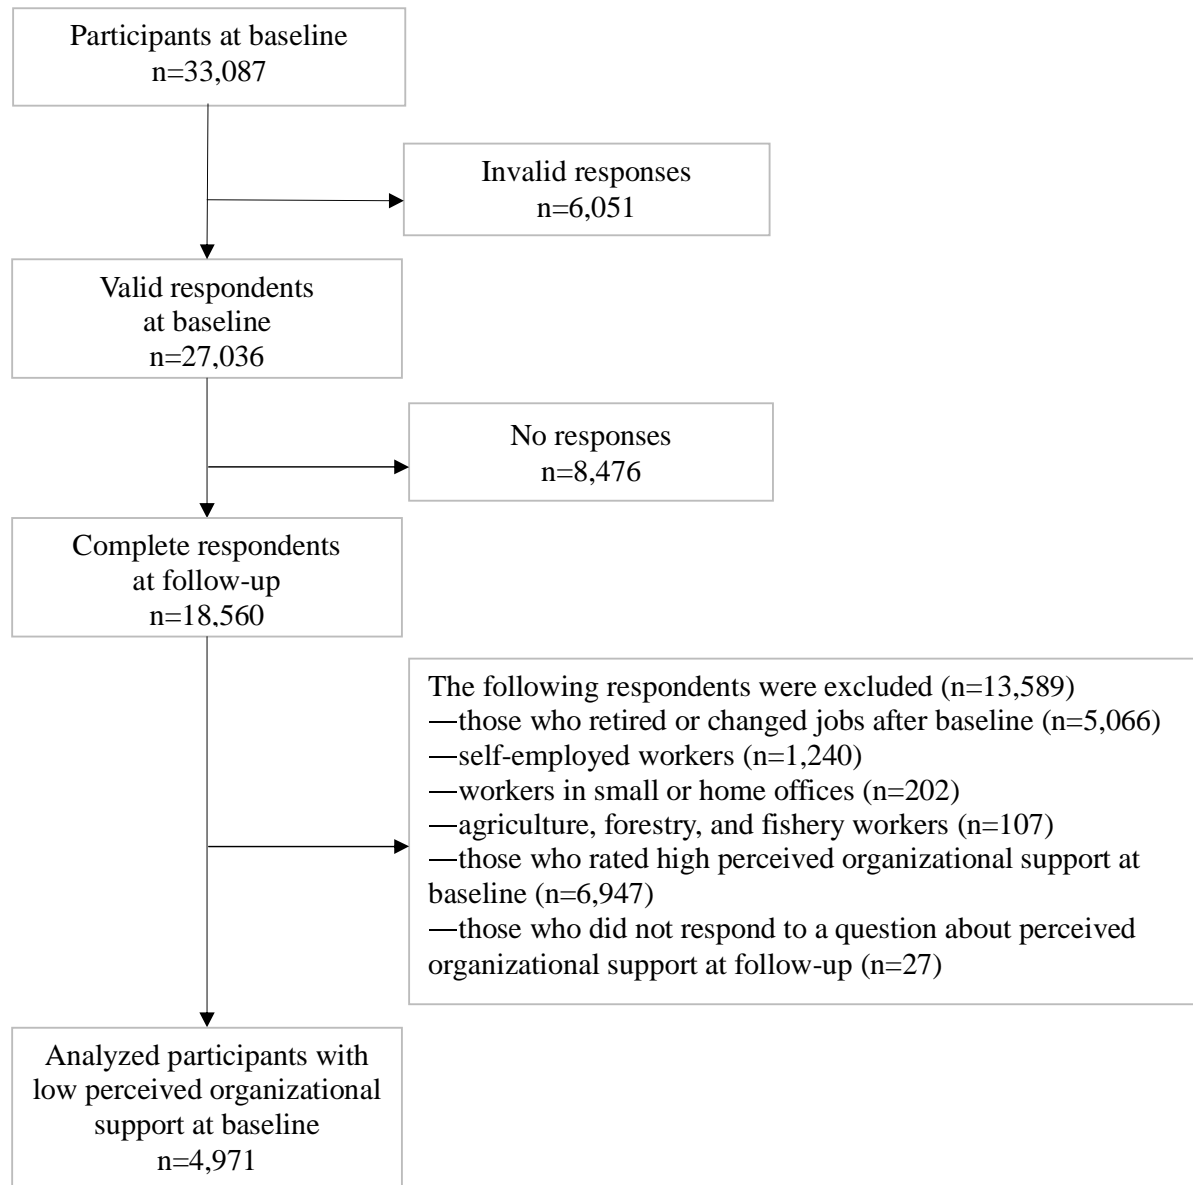

Figure 1. Flow chart for the study

Table 1. Characteristics of participants at baseline according to number of workplace infection control measures

|                                                                         | Number of workplace infection control measures |              |                |                |
|-------------------------------------------------------------------------|------------------------------------------------|--------------|----------------|----------------|
|                                                                         | 0–2<br>n=1,265                                 | 3–4<br>n=884 | 5–6<br>n=1,070 | 7–9<br>n=1,752 |
| Age, mean (SD)                                                          | 47.2 (9.2)                                     | 47.5 (9.2)   | 47.2 (9.5)     | 46.9 (9.3)     |
| Sex, men                                                                | 727 (57.5%)                                    | 486 (55.0%)  | 587 (54.9%)    | 965 (55.1%)    |
| Annual equivalent income (million yen)                                  |                                                |              |                |                |
| <2.50                                                                   | 368 (29.1%)                                    | 199 (22.5%)  | 175 (16.4%)    | 255 (14.6%)    |
| 2.50–3.74                                                               | 396 (31.3%)                                    | 279 (31.6%)  | 275 (25.7%)    | 435 (24.8%)    |
| 3.75–4.99                                                               | 297 (23.5%)                                    | 219 (24.8%)  | 332 (31.0%)    | 542 (30.9%)    |
| ≥5.00                                                                   | 204 (16.1%)                                    | 187 (21.2%)  | 288 (26.9%)    | 520 (29.7%)    |
| Education                                                               |                                                |              |                |                |
| Junior high or high school                                              | 472 (37.3%)                                    | 279 (31.6%)  | 286 (26.7%)    | 392 (22.4%)    |
| Vocational school or college                                            | 305 (24.1%)                                    | 220 (24.9%)  | 238 (22.2%)    | 404 (23.1%)    |
| University or graduate school                                           | 488 (38.6%)                                    | 385 (43.6%)  | 546 (51.0%)    | 956 (54.6%)    |
| Occupation                                                              |                                                |              |                |                |
| General employee                                                        | 847 (67.0%)                                    | 474 (53.6%)  | 575 (53.7%)    | 886 (50.6%)    |
| Manager                                                                 | 74 (5.8%)                                      | 78 (8.8%)    | 108 (10.1%)    | 241 (13.8%)    |
| Executive manager                                                       | 36 (2.8%)                                      | 26 (2.9%)    | 12 (1.1%)      | 23 (1.3%)      |
| Public employee, faculty member, or non-profit organization employee    | 80 (6.3%)                                      | 107 (12.1%)  | 184 (17.2%)    | 226 (12.9%)    |
| Temporary or contract employee                                          | 96 (7.6%)                                      | 132 (14.9%)  | 103 (9.6%)     | 170 (9.7%)     |
| Professional occupation (e.g., lawyer, tax accountant, medical-related) | 62 (4.9%)                                      | 46 (5.2%)    | 67 (6.3%)      | 181 (10.3%)    |
| Other                                                                   | 70 (5.5%)                                      | 21 (2.4%)    | 21 (2.0%)      | 25 (1.4%)      |
| Job type                                                                |                                                |              |                |                |
| Mainly desk work                                                        | 637 (50.4%)                                    | 413 (46.7%)  | 524 (49.0%)    | 957 (54.6%)    |
| Mainly involving interpersonal communication                            | 216 (17.1%)                                    | 219 (24.8%)  | 290 (27.1%)    | 367 (20.9%)    |
| Mainly physical work                                                    | 412 (32.6%)                                    | 252 (28.5%)  | 256 (23.9%)    | 428 (24.4%)    |
| Number of workplace employees                                           |                                                |              |                |                |
| 1–9                                                                     | 425 (33.6%)                                    | 137 (15.5%)  | 72 (6.7%)      | 90 (5.1%)      |
| 10–99                                                                   | 516 (40.8%)                                    | 355 (40.2%)  | 348 (32.5%)    | 329 (18.8%)    |
| 100–999                                                                 | 206 (16.3%)                                    | 233 (26.4%)  | 346 (32.3%)    | 658 (37.6%)    |
| ≥1,000                                                                  | 118 (9.3%)                                     | 159 (18.0%)  | 304 (28.4%)    | 675 (38.5%)    |
| Perceived organizational support at follow-up                           |                                                |              |                |                |
| High                                                                    | 293 (23.2%)                                    | 208 (23.5%)  | 319 (29.8%)    | 605 (34.5%)    |

SD, standard deviation



Table 2. Association between number of workplace infection control measures and high perceived organizational support

| Number of workplace infection control measures | Age-sex adjusted |           |                | Multivariate adjusted* |           |                |
|------------------------------------------------|------------------|-----------|----------------|------------------------|-----------|----------------|
|                                                | OR               | 95% CI    | <i>P</i> value | OR                     | 95% CI    | <i>P</i> value |
| 0–2                                            | Reference        |           | <0.001†        | Reference              |           | <0.001†        |
| 3–4                                            | 1.02             | 0.84–1.26 | 0.817          | 0.97                   | 0.78–1.19 | 0.749          |
| 5–6                                            | 1.41             | 1.17–1.70 | <0.001         | 1.29                   | 1.05–1.57 | 0.014          |
| 7–9                                            | 1.75             | 1.48–2.06 | <0.001         | 1.54                   | 1.28–1.85 | <0.001         |

\*Adjusted for age, sex, income, education, occupation, job type, and number of workplace employees

† *P* for trend

OR, odds ratio; CI, confidence interval
